# Supplementary material for: Evaluation of the collaborative capabilities of students in joint graduation programs based on digital technology
Source: Research Square preprint supplement (doi:10.21203/rs.3.rs-7422817/v1), 2025-11-21
Supplement: Supplementary file 1 [file 08c1ae349216c951ee2f2707.docx]

Questionnaire on of a collaborative ability evaluation system index of the joint graduation design

Dear teachers,

Hello! In order to establish a perfect collaborative ability evaluation system, the real and effective index weights are obtained on the basis of improving the index screening of the collaborative ability cultivation system, so as to form a complete collaborative evaluation system and effectively evaluate students' collaborative ability. Please evaluate and select the importance of the corresponding indicators of the evaluation system for the examination of collaborative ability according to the actual guidance of the joint graduation design and the relevant teaching experience.

Sincerely thank you for your support and help!

The Index weight evaluation table of collaborative ability evaluation system for joint graduation design

| The target layer | The criterion layer | The weight | The indicator layer | The weight |
| --- | --- | --- | --- | --- |
| The evaluation system for the collaborative ability of the joint graduation design of an office building project | Collaborative ability in regard to cognition |  | Collaborative ability in regard to targets |  |
| Collaborative ability in regard to knowledge |  |
| Collaborative ability in regard to relationships |  |
| The Subtotal | 1.0 |
| Collaborative ability in regard to behavior |  | Collaborative ability in regard to software |  |
| Collaborative ability in regard to the workflow |  |
| Collaborative ability in regard to organization |  |
| The Subtotal | 1.0 |
| Collaborative ability in regard to meeting an emergency |  | Collaborative ability in regard to culture |  |
| Collaborative ability in regard to learning |  |
| Collaborative ability in regard to conflict |  |
| The Subtotal | 1.0 |
| The Subtotal | 1.0 |  |  |

Indicator description:

The collaborative ability in regard to cognition refers to the ability of students of all majors facing collaboration to comprehensively use the basic knowledge they have learned to analyze the complex problems corresponding to different task stages.

The collaborative ability in regard to targets refers to the students' basic cognitive level of the required goal and the macro cognition of the whole project goal from the perspective of goal realization and multi goal collaboration.

The collaborative ability in regard to knowledge refers to the ability to understand the basic knowledge required for the goal to be achieved and the collaborative knowledge between the specialty and other specialties.

The collaborative ability in regard to relationships refers to the clear degree of relationship cognition and role positioning among students of different majors.

The collaborative ability in regard to behavior refers to the ability of students to transcend the professional activities of a single discipline, integrate resources and information, and effectively carry out cooperative behaviors such as value acquisition and creation.

The collaborative ability in regard to software refers to the ability to recognize the basic knowledge of related software and solve the collaboration barriers between software.

The collaborative ability in regard to the workflow refers to the workflow problems, the work handover standards, the work completion efficiency, and the resource utilization.

The collaborative ability in regard to organization refers to the level of cooperation within disciplines and specialties, the level of collaboration among specialties within specialty groups, and the degree of standardization of organizations.

The collaborative ability in regard to meeting an emergency refers to the ability of students of different majors to solve the design content conflicts among different majors in the process of joint graduation design collaborative ly.

The collaborative ability in regard to culture refers to the degree of integration of different professional knowledge in the specialty groups, including trust, value orientation, and student decision-making.

The collaborative ability in regard to learning refers to the ability of students to learn new knowledge through collaboration and communication, and solve new problems with new software.

The collaborative ability in regard to conflict refers to the ability to balance, manage and coordinate the trade-offs between various possible conflict problems and solutions.
